# Supplementary material for: Analysis of Raffinose Synthase Gene Family in Bread Wheat and Identification of Drought Resistance and Salt Tolerance Function of TaRS15-3B
Source: MDPI journal article supplement (doi:10.3390/ijms241311185), 2023-07-06
Supplement: s1 [file s1]

## Supplementary Materials

Table S1 The basic information of 34 wheat TaRS genes.

| Gene name | Transcript stable ID | Subfamily | Amino size | MW        | pI   | Instability Index | Aliphatic Index | Grand Average of Hydropathicity | Predicting subcellular localization |
|-----------|----------------------|-----------|------------|-----------|------|-------------------|-----------------|---------------------------------|-------------------------------------|
| TaRS2-1A  | TraesCS1A02G103500.1 | IV        | 402        | 43995.67  | 8.55 | 34.71             | 75.25           | -0.366                          | chlo, extr, vacu                    |
| TaRS4-1A  | TraesCS1A02G103600.1 | IV        | 846        | 91460.44  | 5.2  | 35.9              | 79.59           | -0.085                          | cyto, nucl, chlo, plas, extr        |
| TaRS1-1A  | TraesCS1A02G164800.1 | IV        | 314        | 34727.87  | 7.61 | 35                | 66.56           | -0.518                          | mito, chlo, nucl., nucl_plas        |
| TaRS3-1A  | TraesCS1A02G434900.1 | III       | 373        | 41339.35  | 6.07 | 37.31             | 67.53           | -0.431                          | chlo, nucl, mito, cyto, plas        |
| TaRS5-1B  | TraesCS1B02G181800.1 | IV        | 371        | 41139     | 6.07 | 37.61             | 67.39           | -0.439                          | chlo, nucl., cyto, nucl_plas.       |
| TaRS7-1D  | TraesCS1D02G161900.1 | IV        | 98         | 10759.32  | 9.73 | 48.02             | 72.86           | -0.19                           | pero, nucl, chlo, cyto              |
| TaRS6-1D  | TraesCS1D02G294900.1 | I         | 411        | 44693.02  | 7.04 | 34.57             | 71.31           | -0.414                          | vacu, chlo, extr, golg, nucl        |
| TaRS8-1D  | TraesCS1D02G444000.1 | III       | 799        | 86503.86  | 5.2  | 35.12             | 80.48           | -0.084                          | cyto, nucl, chlo, extr, plas        |
| TaRS10-2A | TraesCS2A02G284600.1 | I         | 767        | 83539.61  | 5.25 | 38.41             | 86.35           | -0.103                          | chlo, cyto, nucl, plas, E.R._vacu   |
| TaRS9-2A  | TraesCS2A02G324700.1 | II        | 98         | 10947.55  | 9.5  | 51.31             | 71.84           | -0.222                          | pero, nucl, chlo, cyto              |
| TaRS11-2B | TraesCS2B02G357600.1 | II        | 1119       | 120845.26 | 8.43 | 49.07             | 80.88           | -0.227                          | cyto, nucl, mito                    |
| TaRS12-2D | TraesCS2D02G338200.1 | II        | 767        | 83608.63  | 5.24 | 37.65             | 85.7            | -0.126                          | chlo, cyto, nucl, plas              |
| TaRS13-3A | TraesCS3A02G092800.1 | III       | 782        | 85073.87  | 5.51 | 33.33             | 85.28           | -0.067                          | cyto, nucl, plas, chlo, E.R._vacu   |
| TaRS14-3A | TraesCS3A02G113900.1 | I         | 752        | 81994.98  | 5.76 | 34.07             | 80.51           | -0.173                          | cyto, chlo, mito                    |
| TaRS16-3B | TraesCS3B02G108000.1 | III       | 756        | 82523.35  | 5.71 | 33.4              | 78.92           | -0.217                          | cyto, mito                          |

Table S1 (continued)

| Gene name | Transcript stable ID | Subfamily | Amino size | MW       | pI        | Instability Index | Aliphatic Index | Grand Average of Hydropathicity | Predicting subcellular localization       |
|-----------|----------------------|-----------|------------|----------|-----------|-------------------|-----------------|---------------------------------|-------------------------------------------|
| TaRS15-3B | TraesCS3B02G133400.1 | I         | 782        | 85005.78 | 5.36      | 33.92             | 84.51           | -0.074                          | cyto, nucl, plas, chlo, E.R._vacu         |
| TaRS18-3D | TraesCS3D02G092900.1 | III       | 787        | 85849.38 | 5.64      | 35.36             | 81.37           | -0.152                          | chlo, vacu, E.R., cyto., cyto_nucl., mito |
| TaRS17-3D | TraesCS3D02G116400.1 | I         | 885        | 96173.5  | 5.78      | 34.41             | 84.38           | -0.078                          | cyto, chlo, nucl, plas, E.R._vacu         |
| TaRS19-4A | TraesCS4A02G174200.1 | I         | 98         | 10860.38 | 9.25      | 61.23             | 70.92           | -0.266                          | pero, nucl, cyto                          |
| TaRS20-5A | TraesCS5A02G173200.1 | IV        | 387        | 42593.86 | 5.14      | 30.43             | 76.98           | -0.349                          | chlo, extr, mito, E.R.                    |
| TaRS23-5B | TraesCS5B02G011700.1 | IV        | 387        | 42593.78 | 5.33      | 30.92             | 74.42           | -0.383                          | chlo, extr, mito                          |
| TaRS21-5B | TraesCS5B02G011800.1 | IV        | 402        | 44009.78 | 8.83      | 34.04             | 73.58           | -0.36                           | chlo, mito, E.R.                          |
| TaRS22-5B | TraesCS5B02G170600.1 | IV        | 401        | 44028.66 | 8.56      | 33.67             | 75.49           | -0.353                          | vacu, chlo, extr, nucl, mito, golg        |
| TaRS25-5D | TraesCS5D02G019100.1 | IV        | 387        | 42686.93 | 5.25      | 28.77             | 75.17           | -0.397                          | chlo, extr, mito                          |
| TaRS26-5D | TraesCS5D02G177700.1 | IV        | 98         | 10829.41 | 9.73      | 51.7              | 70.82           | -0.23                           | pero, nucl, chlo, cyto                    |
| TaRS24-5D | TraesCS5D02G271300.1 | I         | 401        | 44161.88 | 8.37      | 31.53             | 78.15           | -0.326                          | vacu, chlo, golg, nucl, mito, extr, E.R.  |
| TaRS27-5D | TraesCS5D02G300200.1 | I         | 98         | 10877.52 | 9.66      | 57.83             | 69.9            | -0.207                          | pero, nucl, chlo, cyto                    |
| TaRS28-7A | TraesCS7A02G134100.1 | I         | 856        | 90934.31 | 6.06      | 44.49             | 79.6            | -0.103                          | chlo, mito                                |
| TaRS30-7A | TraesCS7A02G236500.1 | I         | 98         | 10802.45 | 10.0<br>3 | 64.74             | 66.94           | -0.256                          | pero, nucl, chlo, cyto                    |
| TaRS29-7A | TraesCS7A02G503400.1 | I         | 749        | 81213.59 | 5.77      | 31.78             | 78.76           | -0.184                          | cyto, nucl, plas, cysk, E.R._vacu         |
| TaRS32-7B | TraesCS7B02G035200.1 | I         | 749        | 81421.8  | 5.65      | 32.34             | 79.13           | -0.197                          | cyto, cysk, plas                          |
| TaRS31-7B | TraesCS7B02G134600.1 | I         | 804        | 85250.95 | 6.02      | 40.07             | 84.45           | -0.01                           | cyto, chlo, nucl, mito                    |
| TaRS33-7D | TraesCS7D02G133500.1 | I         | 798        | 85079.8  | 6.25      | 38.24             | 84.12           | -0.018                          | cyto, chlo, plas, nucl, mito              |
| TaRS34-7D | TraesCS7D02G236700.1 | I         | 749        | 81087.62 | 5.75      | 33.17             | 79.4            | -0.162                          | cyto, nucl, plas, cysk,                   |

Table S2 The number of *RS* genes found in each subfamily of *Triticum aestivum* , *Aegilops tauschii* Coss , *Oryza sativa Japonica* , *Zea mays* , *Arabidopsis thaliana* , *Glycine.max* , *Gossypium raimondii* , *Solanum tuberosum* L. and *Solanum lycopersicum* L.

| Plant class    | species                        | Number of genes |      |        |       |
|----------------|--------------------------------|-----------------|------|--------|-------|
|                |                                | RS I            | RSII | RS III | RS IV |
| Monocotyledons | <i>Triticum aestivum</i>       | 15              | 3    | 5      | 11    |
|                | <i>Aegilops tauschii</i> Coss  | 6               | 1    | 2      | 10    |
|                | <i>Oryza sativa Japonica</i>   | 6               | 1    | 1      | 4     |
|                | <i>Zea mays</i>                | 4               | 5    | 1      | 9     |
|                | <i>Arabidopsis thaliana</i>    | 3               | 0    | 2      | 3     |
| Dicotyledons   | <i>Gossypium raimondii</i>     | 13              | 8    | 5      | 13    |
|                | <i>Glycine.max</i>             | 9               | 3    | 6      | 18    |
|                | <i>Solanum tuberosum</i> L.    | 6               | 7    | 3      | 6     |
|                | <i>Solanum lycopersicum</i> L. | 3               |      | 3      | 3     |

Table S3 The precise location of TaRS gene on wheat chromosomes and homologous gene pairs

| Gene name | Position               | Homologs                     |
|-----------|------------------------|------------------------------|
| TaRS2-1A  | 1A:99657553-99659873   | TaRS4-1A、TaRS21-5B、TaRS25-5D |
| TaRS4-1A  | 1A:99697964-99701912   | TaRS2-1A、TaRS23-5B、TaRS7-1D  |
| TaRS1-1A  | 1A:297744935-297749437 | TaRS5-1B、TaRS7-1D、TaRS2-1A   |
| TaRS3-1A  | 1A:585615984-585620070 | TaRS8-1D                     |
| TaRS5-1B  | 1B:328820458-328824835 | TaRS1-1A、TaRS7-1D、TaRS23-5B  |
| TaRS7-1D  | 1D:229483469-229489471 | TaRS1-1A、TaRS5-1B、TaRS25-5D  |
| TaRS6-1D  | 1D:393950537-393951163 | TaRS29-7A、TaRS24-5D          |
| TaRS8-1D  | 1D:487544924-487548208 | TaRS3-1A                     |
| TaRS10-2A | 2A:478456590-478457216 | TaRS27-5D                    |
| TaRS9-2A  | 2A:554737170-554741912 | TaRS11-2B、TaRS12-2D          |
| TaRS11-2B | 2B:510588121-510591237 | TaRS9-2A、TaRS12-2D           |
| TaRS12-2D | 2D:431676823-431681015 | TaRS9-2A、TaRS11-2B           |
| TaRS13-3A | 3A:58836094-58839205   | TaRS16-3B、TaRS18-3D          |
| TaRS14-3A | 3A:81475905-81479675   | TaRS15-3B、TaRS17-3D          |
| TaRS16-3B | 3B:73627626-73630835   | TaRS13-3A、TaRS18-3D          |
| TaRS15-3B | 3B:115780571-115784482 | TaRS14-3A、TaRS17-3D          |
| TaRS18-3D | 3D:47088455-47090932   | TaRS13-3A、TaRS16-3B          |
| TaRS17-3D | 3D:69854131-69857808   | TaRS14-3A、TaRS15-3B          |
| TaRS19-4A | 4A:444378778-444379403 | NA                           |
| TaRS20-5A | 5A:366629867-366633348 | TaRS22-5B、TaRS26-5D          |
| TaRS23-5B | 5B:11513383-11517316   | TaRS4-1A、TaRS21-5B、TaRS25-5D |
| TaRS21-5B | 5B:11550484-11556238   | TaRS2-1A、TaRS23-5B、TaRS25-5D |
| TaRS22-5B | 5B:315609978-315613753 | TaRS20-5A、TaRS26-5D          |
| TaRS25-5D | 5D:11431758-11435533   | TaRS2-1A、TaRS21-5B、TaRS7-1D  |
| TaRS26-5D | 5D:277555927-277559625 | TaRS20-5A、TaRS22-5B          |
| TaRS24-5D | 5D:375002992-375003618 | TaRS6-1D、TaRS29-7A           |
| TaRS27-5D | 5D:397471556-397472182 | TaRS29-7A、TaRS24-5D          |
| TaRS28-7A | 7A:85911103-85915219   | TaRS32-7B、TaRS33-7D          |
| TaRS30-7A | 7A:209693821-209698303 | TaRS31-7B、TaRS34-7D          |
| TaRS29-7A | 7A:692230361-692230987 | TaRS6-1D                     |
| TaRS32-7B | 7B:34387130-34389855   | TaRS28-7A、TaRS33-7D          |
| TaRS31-7B | 7B:164585536-164590079 | TaRS30-7A、TaRS34-7D          |
| TaRS33-7D | 7D:84600233-84604354   | TaRS28-7A、TaRS32-7B          |
| TaRS34-7D | 7D:199626866-199631358 | TaRS30-7A、TaRS31-7B          |

Table S4 The non redundant collinearity genes of different species and their Ka, Ks and Ka/Ks in the  
TaRS gene family of wheat

| Gene 1    | Gene2            | Ka       | Ks       | Ka/Ks    |
|-----------|------------------|----------|----------|----------|
| TaRS4-1A  | TaRS8-1D         | 0.034802 | 0.129431 | 0.268886 |
| TaRS3-1A  | TaRS6-1D         | 0.005325 | 0.083622 | 0.063678 |
| TaRS5-1B  | TaRS6-1D         | 0.005323 | 0.068454 | 0.077766 |
| TaRS10-2A | TaRS11-2B        | 0.013717 | 0.073593 | 0.186385 |
| TaRS10-2A | TaRS6-1D         | 0.012166 | 0.091464 | 0.133014 |
| TaRS13-3A | TaRS6-1D         | 0.017768 | 0.087598 | 0.202842 |
| TaRS14-3A | TaRS16-3B        | 0.019018 | 0.152141 | 0.125    |
| TaRS13-3A | TaRS17-3D        | 0.018656 | 0.107887 | 0.17292  |
| TaRS14-3A | TaRS18-3D        | 0.022821 | 0.12715  | 0.17948  |
| TaRS15-3B | TaRS17-3D        | 0.008837 | 0.088404 | 0.099957 |
| TaRS16-3B | TaRS18-3D        | 0.023276 | 0.102874 | 0.226259 |
| TaRS20-5A | TaRS23-5B        | 0.022098 | 0.060778 | 0.363585 |
| TaRS20-5A | TaRS25-5D        | 0.015824 | 0.054375 | 0.29102  |
| TaRS23-5B | TaRS25-5D        | 0.01523  | 0.028785 | 0.529106 |
| TaRS21-5B | TaRS24-5D        | 0.042949 | 0.208296 | 0.20619  |
| TaRS28-7A | TaRS31-7B        | 0.026002 | 0.06883  | 0.377778 |
| TaRS29-7A | TaRS32-7B        | 0.019933 | 0.088696 | 0.22473  |
| TaRS28-7A | TaRS33-7D        | 0.025803 | 0.073456 | 0.351267 |
| TaRS29-7A | TaRS34-7D        | 0.013341 | 0.105125 | 0.126905 |
| TaRS32-7B | TaRS34-7D        | 0.016631 | 0.100017 | 0.166282 |
| TaRS32-7B | AT1G55740.1      | 0.21054  | NaN      | NaN      |
| TaRS34-7D | AT1G55740.1      | 0.213935 | NaN      | NaN      |
| TaRS4-1A  | AET1Gv21025900.1 | 0.040373 | 0.136843 | 0.295035 |
| TaRS6-1D  | AET1Gv20424800.7 | 0        | 0.00345  | 0        |
| TaRS8-1D  | AET1Gv21025900.1 | 6.87E-04 | 0        | #NAME?   |
| TaRS10-2A | AET2Gv20764600.1 | 0.012166 | 0.093537 | 0.130066 |
| TaRS13-3A | AET3Gv20201400.1 | 0.016912 | 0.09808  | 0.172429 |
| TaRS15-3B | AET3Gv20201400.1 | 0.007117 | 0.084584 | 0.084143 |
| TaRS16-3B | AET3Gv20252200.1 | 0.023276 | 0.102874 | 0.226259 |
| TaRS18-3D | AET3Gv20252200.1 | 0        | 0        | NaN      |
| TaRS20-5A | AET5Gv20434400.4 | 0.129917 | 0.137609 | 0.944102 |
| TaRS21-5B | AET5Gv20036400.3 | 0.043482 | 0.206982 | 0.210077 |
| TaRS23-5B | AET5Gv20434400.4 | 0.12259  | 0.099738 | 1.229117 |
| TaRS24-5D | AET5Gv20036400.3 | 0        | 0        | NaN      |
| TaRS25-5D | AET5Gv20434400.4 | 0.123178 | 0.097661 | 1.261286 |
| TaRS27-5D | AET5Gv20682600.1 | 0        | 0        | NaN      |
| TaRS28-7A | AET7Gv20338600.2 | 0.030422 | 0.088871 | 0.342315 |
| TaRS29-7A | AET7Gv20586000.6 | 0.013341 | 0.105125 | 0.126905 |
| TaRS32-7B | AET7Gv20586000.6 | 0.016631 | 0.100017 | 0.166282 |
| TaRS34-7D | AET7Gv20586000.6 | 0        | 0        | NaN      |
| TaRS10-2A | KRH63661         | 0.312082 | 4.253764 | 0.073366 |

Table S4  
(continued)

| Gene 1    | Gene2                    | Ka       | Ks       | Ka/Ks    |
|-----------|--------------------------|----------|----------|----------|
| TaRS10-2A | KRH54286                 | 0.327436 | NaN      | NaN      |
| TaRS13-3A | KRH57114                 | 0.316905 | 3.432716 | 0.092319 |
| TaRS13-3A | KRH54343                 | 0.283557 | NaN      | NaN      |
| TaRS15-3B | KRH57114                 | 0.310907 | NaN      | NaN      |
| TaRS15-3B | KRH54343                 | 0.278225 | NaN      | NaN      |
| TaRS28-7A | KRH20155                 | 0.256039 | 1.545269 | 0.165692 |
| TaRS28-7A | KRH03657                 | 0.261119 | 1.659674 | 0.157332 |
| TaRS34-7D | KRH36658                 | 0.47402  | NaN      | NaN      |
| TaRS6-1D  | KJB79780                 | 0.277668 | NaN      | NaN      |
| TaRS10-2A | KJB19525                 | 0.365706 | NaN      | NaN      |
| TaRS29-7A | KJB81540                 | 0.184247 | NaN      | NaN      |
| TaRS32-7B | KJB63105                 | 0.220068 | NaN      | NaN      |
| TaRS34-7D | KJB81540                 | 0.184617 | NaN      | NaN      |
| TaRS34-7D | KJB63105                 | 0.220912 | NaN      | NaN      |
| TaRS6-1D  | Os10t0492900-01          | 0.294388 | 1.330272 | 0.221299 |
| TaRS10-2A | Os04t0481100-02          | 0.131099 | 0.491769 | 0.266587 |
| TaRS13-3A | Os01t0170000-01          | 0.120371 | 0.297019 | 0.405264 |
| TaRS15-3B | Os01t0170000-01          | 0.117591 | 0.267137 | 0.44019  |
| TaRS28-7A | Os06t0172800-00          | 0.166157 | 0.595842 | 0.278861 |
| TaRS29-7A | Os08t0495800-02          | 0.082413 | 0.689327 | 0.119556 |
| TaRS32-7B | Os08t0495800-02          | 0.078448 | 0.646026 | 0.121431 |
| TaRS34-7D | Os08t0495800-02          | 0.079065 | 0.679402 | 0.116375 |
| TaRS13-3A | Solyc03g112500.3.1       | 0.120371 | NaN      | NaN      |
| TaRS15-3B | Solyc03g112500.3.1       | 0.082413 | NaN      | NaN      |
| TaRS32-7B | Solyc07g065980.3.1       | 0.184617 | NaN      | NaN      |
| TaRS10-2A | PGSC0003DMT4000391<br>95 | 0.317026 | NaN      | NaN      |
| TaRS13-3A | PGSC0003DMT4000466<br>36 | 0.266292 | NaN      | NaN      |
| TaRS32-7B | PGSC0003DMT4000573<br>20 | 0.214123 | NaN      | NaN      |
| TaRS34-7D | PGSC0003DMT4000573<br>20 | 0.212059 | NaN      | NaN      |
| TaRS6-1D  | Zm00001eb044840_T001     | 0.103935 | 0.813602 | 0.127746 |
| TaRS10-2A | Zm00001eb079430_T001     | 0.134927 | 0.543573 | 0.248223 |
| TaRS13-3A | Zm00001eb122980_T001     | 0.110372 | 0.384147 | 0.287317 |
| TaRS15-3B | Zm00001eb122980_T001     | 0.103905 | 0.392396 | 0.264796 |
| TaRS28-7A | Zm00001eb281720_T002     | 0.147354 | 0.382349 | 0.385393 |
| TaRS29-7A | Zm00001eb033870_T003     | 0.106151 | 0.857501 | 0.123791 |
| TaRS32-7B | Zm00001eb033870_T003     | 0.10593  | 0.909002 | 0.116535 |
| TaRS34-7D | Zm00001eb033870_T003     | 0.106616 | 0.892232 | 0.119493 |

Table S5 GO Enrichment Analysis of TaRS

| Gene name          | GO Term                                                                                                                                                                                                                                                       |
|--------------------|---------------------------------------------------------------------------------------------------------------------------------------------------------------------------------------------------------------------------------------------------------------|
| TraesCS1A02G164800 | GO:0005737 GO:0007020 GO:0052692 GO:0009620 GO:0009911<br>GO:0009965 GO:0016139 GO:0048046 GO:0071555 GO:0046477<br>GO:0000023 GO:0009505 GO:0043085 GO:0019252                                                                                               |
| TraesCS5B02G011800 | GO:0005737 GO:0007020 GO:0052692 GO:0009620 GO:0009911<br>GO:0009965 GO:0016139 GO:0048046 GO:0071555 GO:0046477<br>GO:0000023 GO:0009505 GO:0043085 GO:0019252                                                                                               |
| TraesCS3B02G133400 | GO:0047274 GO:0005737 GO:0052692 GO:0034484 GO:0080167<br>GO:0009409 GO:0006979 GO:0009506                                                                                                                                                                    |
| TraesCS5B02G011700 | GO:0005737 GO:0007020 GO:0052692 GO:0009620 GO:0009911<br>GO:0009965 GO:0016139 GO:0048046 GO:0071555 GO:0046477<br>GO:0000023 GO:0009505 GO:0043085 GO:0019252                                                                                               |
| TraesCS1A02G434900 | GO:0005737 GO:0047274 GO:0005975 GO:0047268 GO:0080167<br>GO:0004553 GO:0006979                                                                                                                                                                               |
| TraesCS7D02G236700 | GO:0047274 GO:0018107 GO:0052692 GO:0018105 GO:0009737<br>GO:0009414 GO:0004674 GO:0005986 GO:0010325 GO:0034484<br>GO:0080167 GO:0005886 GO:0009409 GO:0035556 GO:0009507<br>GO:0006979 GO:0005524 GO:0019593                                                |
| TraesCS2A02G284600 | GO:0003824 GO:0008152                                                                                                                                                                                                                                         |
| TraesCS7A02G236500 | GO:0047274 GO:0018107 GO:0052692 GO:0018105 GO:0009737<br>GO:0009414 GO:0004674 GO:0005986 GO:0010325 GO:0034484<br>GO:0080167 GO:0005886 GO:0009409 GO:0035556 GO:0009507<br>GO:0006979 GO:0005524 GO:0019593                                                |
| TraesCS1A02G103600 | GO:0005737 GO:0007020 GO:0052692 GO:0009620 GO:0009911<br>GO:0009965 GO:0016139 GO:0048046 GO:0071555 GO:0046477<br>GO:0000023 GO:0009505 GO:0043085 GO:0019252                                                                                               |
| TraesCS2A02G324700 | GO:0047274 GO:0052692 GO:0034484 GO:0080167 GO:0009409<br>GO:0006979                                                                                                                                                                                          |
| TraesCS2B02G357600 | GO:0047274 GO:0052692 GO:0034484 GO:0080167 GO:0009409<br>GO:0006979                                                                                                                                                                                          |
| TraesCS1B02G181800 | GO:0052692 GO:0009965 GO:0016139 GO:0048046 GO:0032940<br>GO:0050825 GO:0050826 GO:0000023 GO:0043085 GO:0007020<br>GO:0031410 GO:0016020 GO:0071555 GO:0017153 GO:0019252<br>GO:0006835 GO:0042309 GO:0009505 GO:0009620 GO:0009911<br>GO:0005515 GO:0046477 |
| TraesCS1D02G161900 | GO:0005737 GO:0007020 GO:0052692 GO:0009620 GO:0009911<br>GO:0009965 GO:0016139 GO:0048046 GO:0071555 GO:0046477<br>GO:0000023 GO:0009505 GO:0043085 GO:0019252                                                                                               |
| TraesCS5D02G019100 | GO:0005737 GO:0007020 GO:0052692 GO:0009620 GO:0009911<br>GO:0009965 GO:0016139 GO:0048046 GO:0071555 GO:0046477<br>GO:0000023 GO:0009505 GO:0043085 GO:0019252                                                                                               |
| TraesCS1A02G103500 | GO:0005737 GO:0007020 GO:0052692 GO:0005515 GO:0009620<br>GO:0009911 GO:0009965 GO:0016139 GO:0048046 GO:0071555<br>GO:0050825 GO:0042309 GO:0050826 GO:0046477 GO:0000023<br>GO:0009505 GO:0043085 GO:0019252                                                |

Table S5 (continued)

| Gene name          | GO Term                                                                                                                                                                                                        |
|--------------------|----------------------------------------------------------------------------------------------------------------------------------------------------------------------------------------------------------------|
| TraesCS7A02G134100 | GO:0003824 GO:0008152                                                                                                                                                                                          |
| TraesCS3D02G092900 | GO:0047274 GO:0018107 GO:0052692 GO:0018105 GO:0009737<br>GO:0009414 GO:0004674 GO:0005986 GO:0010325 GO:0034484<br>GO:0080167 GO:0005886 GO:0009409 GO:0035556 GO:0009507<br>GO:0006979 GO:0005524 GO:0019593 |
| TraesCS3A02G092800 | GO:0047274 GO:0018107 GO:0052692 GO:0018105 GO:0009737<br>GO:0009414 GO:0004674 GO:0005986 GO:0010325 GO:0034484<br>GO:0080167 GO:0005886 GO:0009409 GO:0035556 GO:0009507<br>GO:0006979 GO:0005524 GO:0019593 |
| TraesCS5D02G300200 | GO:0003824 GO:0008152                                                                                                                                                                                          |
| TraesCS5D02G177700 | GO:0005737 GO:0007020 GO:0052692 GO:0009620 GO:0009911<br>GO:0009965 GO:0016139 GO:0048046 GO:0071555 GO:0046477<br>GO:0000023 GO:0009505 GO:0043085 GO:0019252                                                |
| TraesCS3B02G108000 | GO:0047274 GO:0018107 GO:0052692 GO:0018105 GO:0009737<br>GO:0009414 GO:0004674 GO:0005986 GO:0010325 GO:0034484<br>GO:0080167 GO:0005886 GO:0009409 GO:0035556 GO:0009507<br>GO:0006979 GO:0005524 GO:0019593 |
| TraesCS2D02G338200 | GO:0047274 GO:0052692 GO:0034484 GO:0080167 GO:0009409<br>GO:0006979                                                                                                                                           |
| TraesCS7D02G133500 | GO:0003824 GO:0008152                                                                                                                                                                                          |
| TraesCS1D02G444000 | GO:0005737 GO:0047274 GO:0005975 GO:0047268 GO:0080167<br>GO:0004553 GO:0006979                                                                                                                                |
| TraesCS3D02G116400 | GO:0047274 GO:0005737 GO:0052692 GO:0034484 GO:0080167<br>GO:0009409 GO:0006979 GO:0009506                                                                                                                     |
| TraesCS5A02G173200 | GO:0005737 GO:0007020 GO:0052692 GO:0009620 GO:0009911<br>GO:0009965 GO:0016139 GO:0048046 GO:0071555 GO:0046477<br>GO:0000023 GO:0009505 GO:0043085 GO:0019252                                                |
| TraesCS7B02G134600 | GO:0047274 GO:0018107 GO:0052692 GO:0018105 GO:0009737<br>GO:0009414 GO:0004674 GO:0005986 GO:0010325 GO:0034484<br>GO:0080167 GO:0005886 GO:0009409 GO:0035556 GO:0009507<br>GO:0006979 GO:0005524 GO:0019593 |
| TraesCS5B02G170600 | GO:0005737 GO:0007020 GO:0052692 GO:0009620 GO:0009911<br>GO:0009965 GO:0016139 GO:0048046 GO:0071555 GO:0046477<br>GO:0000023 GO:0009505 GO:0043085 GO:0019252                                                |
| TraesCS3A02G113900 | GO:0047274 GO:0005737 GO:0052692 GO:0034484 GO:0080167<br>GO:0009409 GO:0006979 GO:0009506                                                                                                                     |
| TraesCS7B02G035200 | GO:0003824 GO:0008152                                                                                                                                                                                          |
| TraesCS1D02G294900 | GO:0034484 GO:0052692 GO:0080167 GO:0016757 GO:0006979                                                                                                                                                         |
| TraesCS4A02G174200 | GO:0034484 GO:0052692 GO:0080167 GO:0016757 GO:0006980                                                                                                                                                         |
| TraesCS5D02G271300 | GO:0034484 GO:0052692 GO:0080167 GO:0016757 GO:0006981                                                                                                                                                         |
| TraesCS7A02G503400 | GO:0034484 GO:0052692 GO:0080167 GO:0016757 GO:0006982                                                                                                                                                         |

Table S6 Cis-acting elements of *TaRS15-3B* genes.

| Cis-acting name | element | Number of copies | Function                                                                  | Classification               |
|-----------------|---------|------------------|---------------------------------------------------------------------------|------------------------------|
| CAAT-box        |         | 26               | Elements common to promoter and enhancer regions                          | CAAT-box and TATA-box        |
| TATA-box        |         | 23               | Core promoter elements                                                    | CAAT-box and TATA-box        |
| Box 4           |         | 1                | Elements involved in light reactions                                      | Light responsiveness         |
| C-box           |         | 1                | Photoreaction-related elements                                            | Light responsiveness         |
| GATA-motif      |         | 1                | Photoreaction-related elements                                            | Light responsiveness         |
| G-box           |         | 7                | Photoreaction-related elements                                            | Light responsiveness         |
| GT1-motif       |         | 3                | Photoreaction-related elements                                            | Light responsiveness         |
| I-box           |         | 1                | Photo-responsive components                                               | Light responsiveness         |
| ABRE            |         | 17               | Abscisic acid response element                                            | Phytohormone responsiveness  |
| CGTCA-motif     |         | 3                | Methyl jasmonate response element                                         | Phytohormone responsiveness  |
| O2-site         |         | 1                | Methyl jasmonate response element                                         | Phytohormone responsiveness  |
| P-box           |         | 1                | Erythromycin response element                                             | Phytohormone responsiveness  |
| TGACG-motif     |         | 3                | Methyl jasmonate response element                                         | Phytohormone responsiveness  |
| TGA-element     |         | 1                | Growth factor response element                                            | Phytohormone responsiveness  |
| as-1            |         | 3                | Root-specific expression element                                          | Plant growth and development |
| motif I         |         | 1                | Root-specific expression elements                                         | Plant growth and development |
| MSA-like        |         | 1                | Cis-acting elements involved in cell cycle regulation                     | Plant growth and development |
| ARE             |         | 1                | Cis-regulatory elements essential for anaerobic induction                 | Stress responsiveness        |
| DRE core        |         | 4                | Drought, hypersalinity and low temperature responsive cis-acting elements | Stress responsiveness        |
| GC-motif        |         | 1                | Enhancer-like elements involved in hypoxia-specific induction             | Stress responsiveness        |
| MBS             |         | 1                | MYB-binding site, involved in drought induction                           | Stress responsiveness        |
| MBSI            |         | 2                | MYB-binding site, involved in drought induction                           | Stress responsiveness        |
| MYB             |         | 7                | Drought abiotic stress                                                    | Stress responsiveness        |
| MYB             |         | 1                | Drought abiotic stresses                                                  | Stress responsiveness        |
| MYC             |         | 4                | Abiotic stresses such as drought and salt                                 | Stress responsiveness        |
| STRE            |         | 2                | Stress response elements                                                  | Stress responsiveness        |

Table S7 The primers used in this study

| Target segments                     | Forward sequence (5'-3')                    | Reverse sequence (5'-3')                    |
|-------------------------------------|---------------------------------------------|---------------------------------------------|
| TaRS3-1A                            | ATCCTGATATGCTCGAAGTTGG                      | TTATGGTCTTTGTCTGCGGG                        |
| TaRS10-2A                           | GAGAGGCTGGTTGATCTGAAG                       | CCTCCCAATAACCAAGTAAAG                       |
| TaRS13-3A                           | ATCGGCAAGCTGCTCGACACGC                      | GAGGAGGAGCACGTAGGGACG                       |
| TaRS15-3B                           | CTGGTTGACACGAGGTTTCAT                       | CATCATCTGGGTCTCGTTCTC                       |
| TaRS17-3D                           | ACTTCCAGGGGCTGACGGAG                        | AGAGGGAGTTGTAAGCGCAG                        |
| TaRS18-3D                           | GAGAGGCTGGTTGATCTGAAG                       | CCTCCCAATAACCAAGTAAAG                       |
| TaCAT3-F                            | CGCTCACTGATGCTCGTGTTACC                     | TCCATCTACATGCTCGGCTTAAT<br>CTTG             |
| TaSODI-F                            | TCCTTTGACTGGCCCTAATG                        | CTTCCACCAGCATTTCAGT                         |
| TaPODA1                             | AGCACACAAGGAGAGAGGAG                        | AAGAGGCACGCGGTATCG                          |
| TaLEA7-F                            | GTCGAGAGCAAGGACCAGAC                        | CCTGTCCTGCGTGTACTGC                         |
| TaP5CS-F                            | GACAAGTCCCGTGTTGGTAGAG                      | CGTGCAGCAACAGCCATTT                         |
| TaDREB1-F                           | GAACCACTCCCTCCATCTC                         | TTCACAGCACCGACCAA                           |
| $\beta$ -actin                      | AAGAGTCGGTGAAGGGGACT                        | GGAAAAGCTGAACCGAGACTG                       |
| TaRS15-3B Silent<br>fragment linker | TAGCTAGCTGATTAATTAAGATC<br>GTGGACAAGTTCGGGT | TTGCTAGCTGAGCGGCCGCTCCT<br>GGAAGTTGATGAGCCG |
| TaRS15-3B Silent<br>fragment        | GATCGTGGACAAGTTCGGGT                        | TCCTGGAAGTTGATGAGCCG                        |

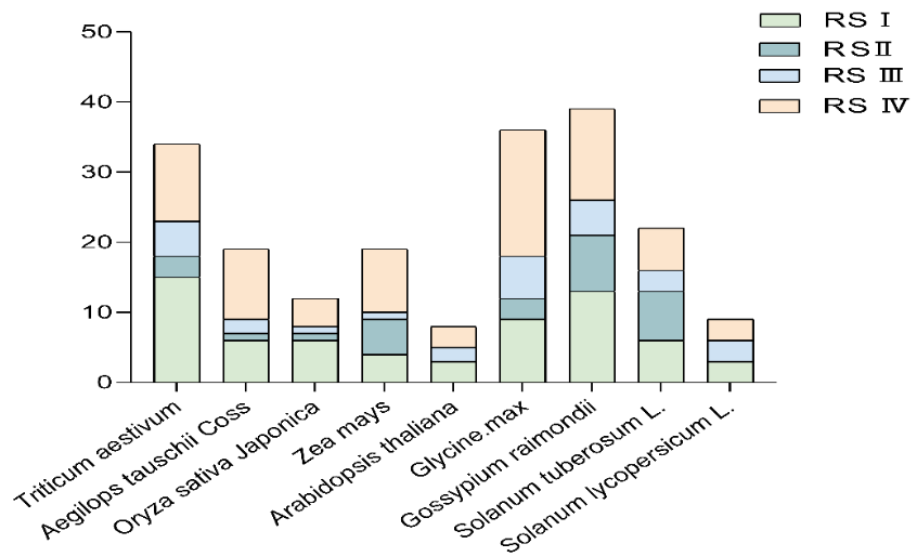

Figure S1 The number of *RS* genes found in each subfamily of *Triticum aestivum*, *Aegilops tauschii* Coss, *Oryza sativa* Japonica, *Zea mays*, *Arabidopsis thaliana*, *Glycine.max*, *Gossypium raimondii*, *Solanum tuberosum* L. and *Solanum lycopersicum* L.

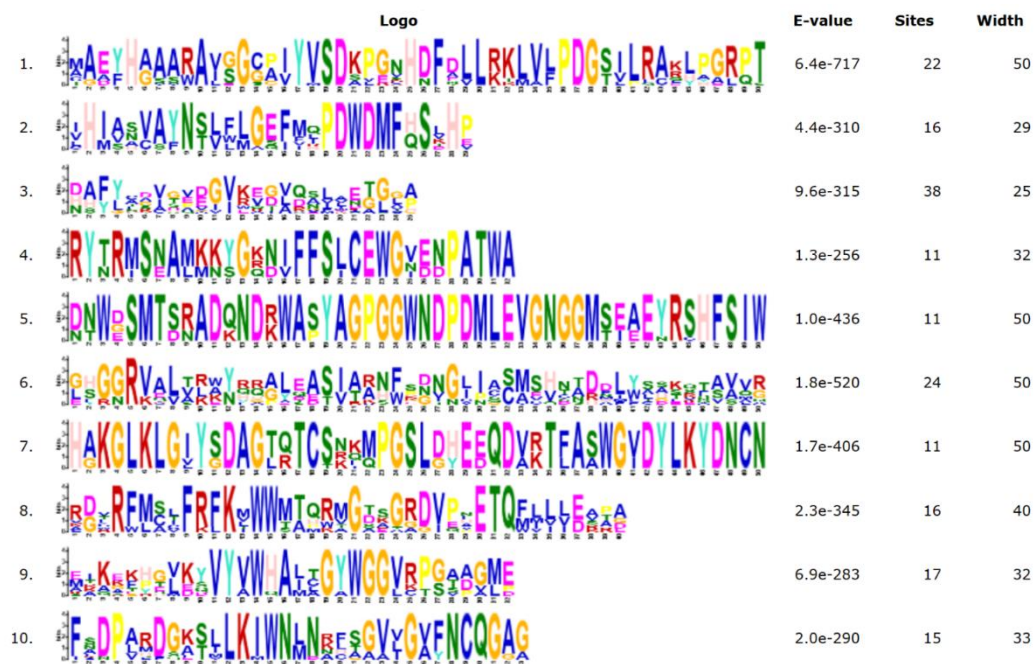

Figure S2 Information of the identified motifs in TaRS proteins.

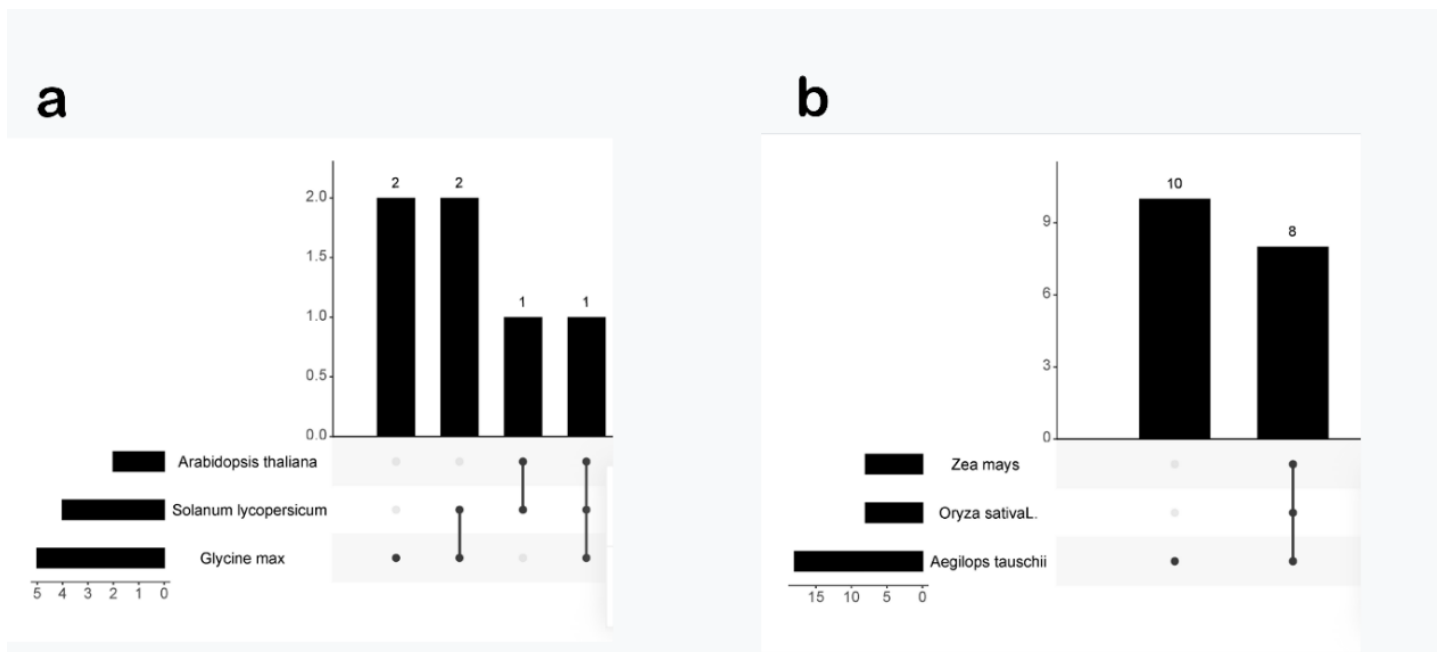

Figure S3 UpSet diagram of non redundant genes between wheat, monocotyledonous plants, and dicotyledonous plants

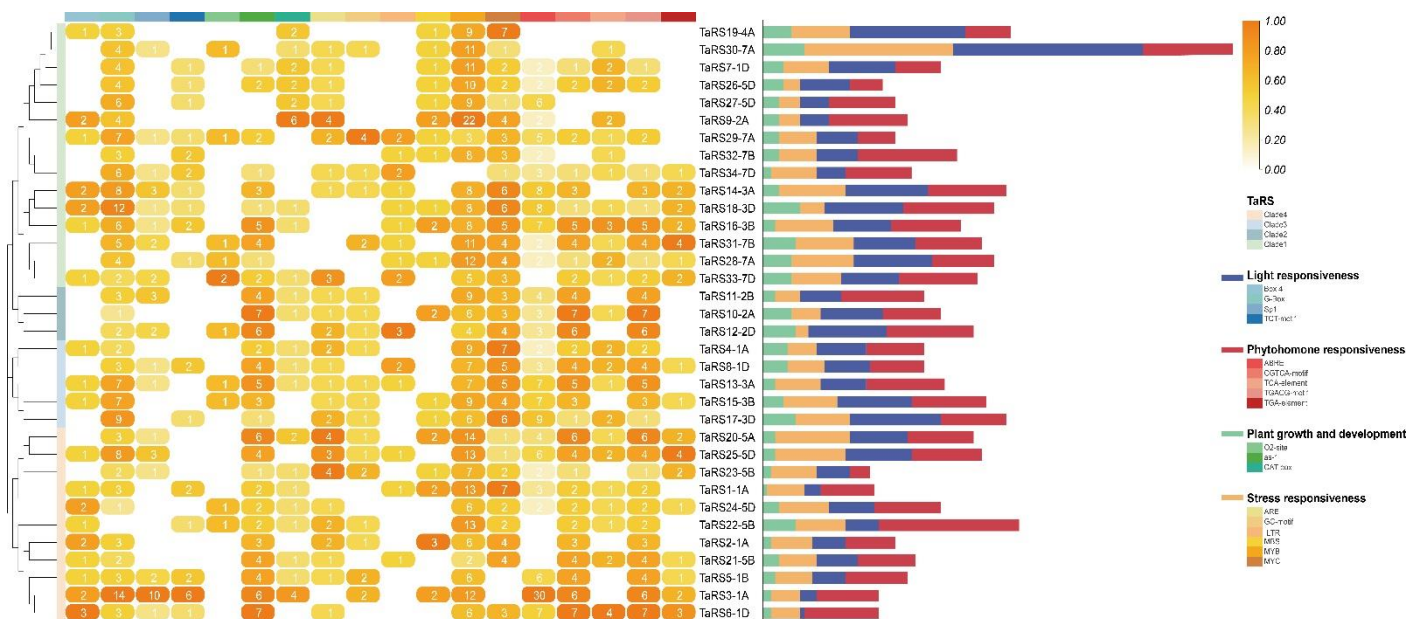

Figure S4 Cis-acting elements of wheat *TaRS* genes. a) Heatmap of cis-acting elements per *TaRS* genes numbers; deep colors indicate the more cis-acting elements; white means no cis-acting elements. The column icon on the right indicates the number of cis-acting elements for each *TaRS* gene. Different types of cis-acting elements are shown in different colors.

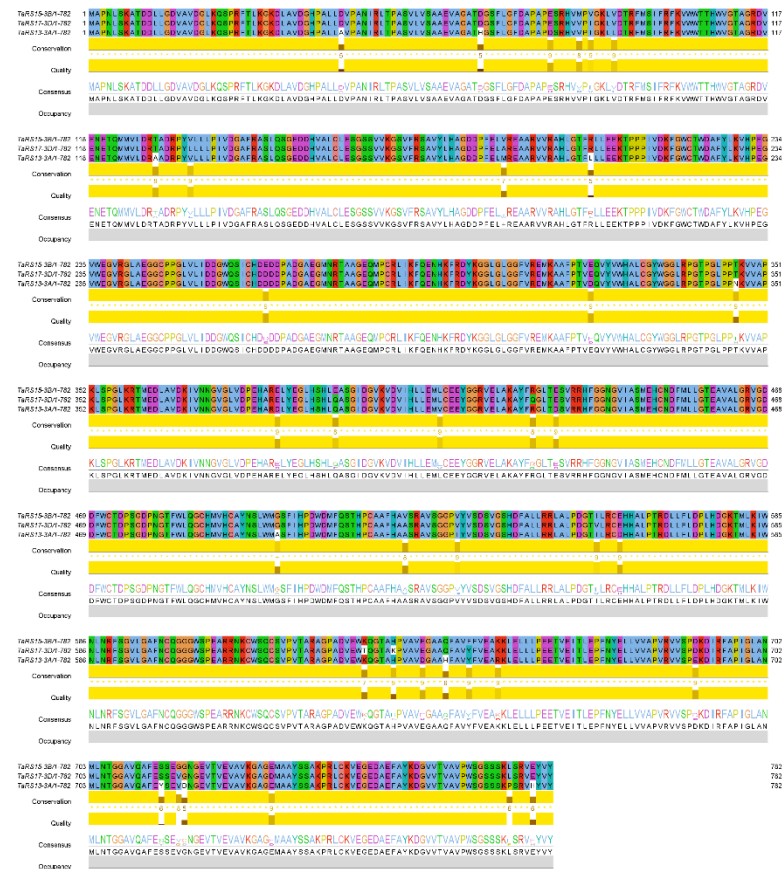

Figure S5 TaRS15-3B Protein Multiple Sequence Alignment

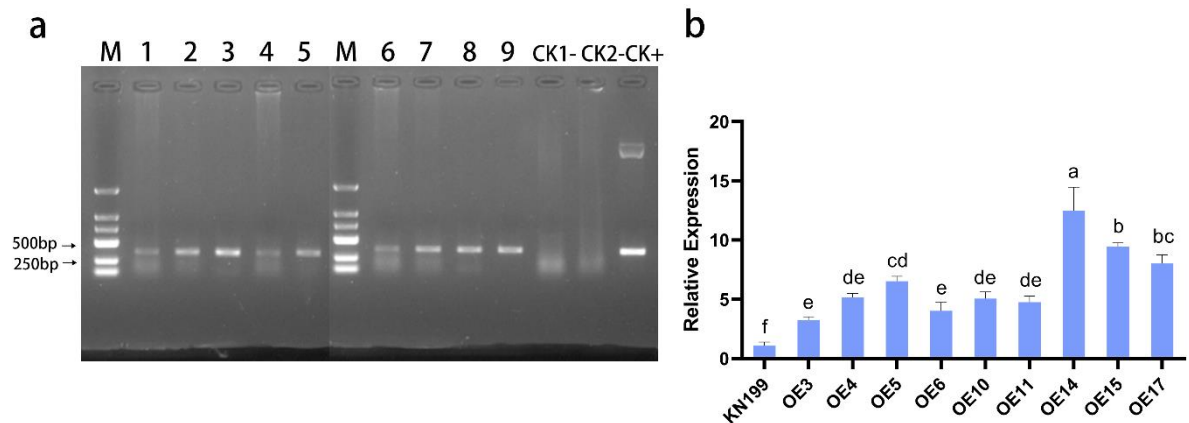

Figure S6 Generation and identification of overexpressing TaRS15-3B wheat: (a) PCR assay of overexpressing TaRS15-3B wheat, M: DL2000; 1-9: for OE3, 4, 5, 6, 10, 11, 14, 15, 17 respectively; CK1:-KN199; CK2:-H2O; CK+:positive plasmid t; (b) qPCR assay of overexpressing TaRS15-3B wheat

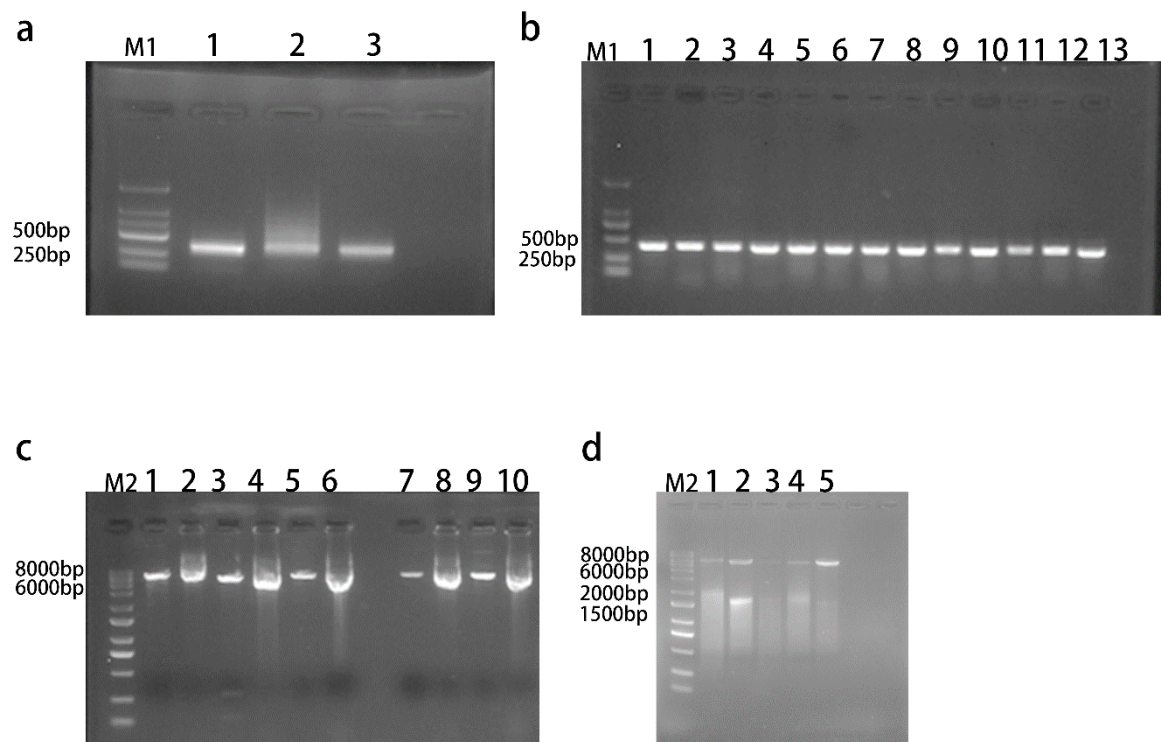

Figure S7 Construction of BSMV-VIGS vector: (a) acquisition of silenced fragments; (b) Construction of BSMV:  $\gamma$ -*TaRS15-3B* vector; (c) vector linearization; (d) : in vitro transcription
